# Supplementary material for: Associations of preoperative stroke and tranexamic acid administration with convulsive seizures in valvular open-heart surgery
Source: Springer Nature journal article supplement (doi:10.1007/s00540-021-02924-w), 2021-04-06
Supplement: MOESM1 [file 19039990]

# Associations of Preoperative Stroke and Tranexamic Acid Administration with Convulsive Seizures in Valvular Open-Heart Surgery

## Journal of Anesthesia

Nikolai Hulde, Armin Zittermann<sup>1</sup>, Marcus-André Deutsch, Vera von Dossow,

Jan F. Gummert, and Andreas Koster

### <sup>1</sup>Corresponding Author:

Armin Zittermann, PhD  
Clinic for Cardiothoracic Surgery  
Herz- und Diabeteszentrum NRW  
Ruhr University Bochum  
D-32545 Bad Oeynhausen  
Georgstr. 11  
E-mail: [azittermann@hdz-nrw.de](mailto:azittermann@hdz-nrw.de)  
Phone: +49 5731 97-3296  
Fax: +49 5731 97-2020

### *Statistical Analysis*

The association of preoperative factors with convulsive seizures was first tested in a univariate logistic regression model. Every univariate variable showing significant ( $P < 0.05$ ) association with the risk of seizure was then tested in a multivariable logistic regression model and removed stepwise if no significant influence was proved. The following 21 parameters were tested: age, sex, body mass index, diabetes mellitus, hypertension, myocardial infarction, chronic obstructive pulmonary disease, left ventricular ejection fraction, estimated glomerular filtration rate, hemoglobin, peripheral artery disease, three vessel disease, carotid stenosis, Euroscore II, aspirin use, smoking status, previous cardiac surgery, operation priority, type of surgery, history of stroke, and use of tranexamic acid. Only those variables which were significantly ( $P < 0.05$ ) associated with clinical outcome remained in the multivariable model. The Hosmer-Lemeshow test was used to test for goodness of fit for the logistic regression models. The risk factor analysis of convulsive seizures is presented in Supplemental Table 1. The model was sufficiently calibrated among deciles of observed and expected risk (Hosmer-Lemeshow test  $p = 0.37$ ).

The association of seizures with short-term mortality was assessed using inverse probability weighting. The following formula was applied:  $T/PS + (1 - T)/(1 - PS)$ , whereas T indicates patient's status being 0 in patients without seizure and 1 in patients with seizure. PS indicates the propensity score of each patient. The propensity score was based on the aforementioned 21 preoperative parameters.

**Supplemental Table 1:** Risk factor analysis of convulsive seizure in patients undergoing valvular open-heart surgery

| Parameter                                                              | Univariate<br>OR (95%CI) | Multivariable<br>OR (95%CI) | P-value <sup>1</sup> |
|------------------------------------------------------------------------|--------------------------|-----------------------------|----------------------|
| Age (per year)                                                         | 1.04 (1.03-1.05)         | 1.03 (1.02-1.04)            | <0.001               |
| Female Sex                                                             | 1.41 (1.16-1.71)         | -                           |                      |
| Body Mass Index (per unit)                                             | 0.95 (0.93-0.98)         | 0.95 (.93-0.97)             | <0.001               |
| Three-Vessel Disease (reference: no)                                   | 1.15 (1.07-1.24)         | -                           |                      |
| Peripheral Artery Disease (reference: no)                              | 1.86 (1.35-2.55)         | -                           |                      |
| Carotid Stenosis (reference: no)                                       | 1.92 (1.39-2.64)         | 1.42 (1.02-1.98)            | 0.037                |
| Hypertension (reference: no)                                           | 1.35 (1.05-1.73)         | -                           |                      |
| Stroke (reference: no)                                                 | 2.35 (1.68-3.30)         | 1.79 (1.27-2.54)            | 0.001                |
| Previous Cardiac Surgery (reference: no)                               | 1.85 (1.57-2.19)         | 1.45 (1.22-1.73)            | <0.001               |
| Left Ventricular Ejection Fraction (per %)                             | 0.98 (0.97-0.99)         | 0.99 (.98-1.00)             | 0.009                |
| Estimated Glomerular Filtration Rate (per ml/min/1.73 m <sup>2</sup> ) | 0.98 (0.97-0.98)         | 0.98 (0.98-0.99)            | <0.001               |
| Hemoglobin (per g/dl)                                                  | 0.82 (0.79-0.86)         | 0.92 (0.88-0.97)            | 0.02                 |
| Euroscore II (per unit)                                                | 1.03 (1.03-1.04)         | -                           |                      |
| Operation Priority                                                     |                          | -                           |                      |
| Elective                                                               | 1.0 (reference)          |                             |                      |
| Urgent                                                                 | 1.96 (1.38-2.80)         |                             |                      |
| Emergent/Ultima ratio                                                  | 1.90 (1.32-2.74)         |                             |                      |
| Use of Tranexamic Acid                                                 | 2.65 (1.89-3.70)         | 2.40 (1.71-3.37)            | <0.001               |

<sup>1</sup>only significant results in multivariable-adjusted analysis are presented. No significant association with convulsive seizure in univariate analysis was present for: diabetes mellitus, chronic obstructive pulmonary disease, myocardial infarction, smoking status, aspirin use, and surgical group, Abbreviations: OR, odds ratio, CI, confidence interval
